# Supplementary material for: Facile and robust construction of a 3D-hierarchical NaNbO3-nanorod/ZnIn2S4 heterojunction towards ultra-high photocatalytic H2 production
Source: Royal Society of Chemistry journal article supplement (doi:10.1039/d2cy00115b), 2022-01-01
Supplement: d2cy00115b1.pdf [file d2cy00115b1.pdf]

## *Supporting Information*

# **Facile and Robust Construction of 3D-Hierarchical NaNbO<sub>3</sub>-Nanorod/ZnIn<sub>2</sub>S<sub>4</sub> Heterojunction toward Ultra- high Photocatalytic H<sub>2</sub> Production**

Juhua Zhang, Huajun Gu, Xinglin Wang, Huihui Zhang, Lingfeng Li, Xiaohao Wang,  
Wei-Lin Dai\*

Department of Chemistry and Shanghai Key Laboratory of Molecular Catalysis and  
Innovative Materials, Fudan University, Shanghai 200433, P. R. China

### **1. Materials**

Niobium pentaoxide (Nb<sub>2</sub>O<sub>5</sub>), zinc chloride (ZnCl<sub>2</sub>), indium chloride tetrahydrate (InCl<sub>3</sub>·4H<sub>2</sub>O) and thioacetamide (TAA) were purchased from Aladdin Bio-Chem Technology Co., Ltd., Sodium hydroxide (NaOH), sodium sulfide nonahydrate (Na<sub>2</sub>S·9H<sub>2</sub>O), sodium sulfite (Na<sub>2</sub>SO<sub>3</sub>), N, N-dimethylformamide (DMF) and glycerol were purchased from Sinopharm Chemical Reagent Co., Ltd. Deionized water and ethanol were used as received without further purification.

### **2. Materials characterization**

The morphologies and microstructures of composites were studied using a scanning electron microscopy (SEM, Phenom Prox, Netherlands), a transmission electron microscope (TEM, JEM-2011, JOEL) and a field emission transmission

electron microscope (FE-TEM, Tecnai G2 F20 S-Twin) operated at an accelerating voltage of 200 kV. A D2 phase X-ray diffractometer (XRD, D2 PHASER) was used to measure the crystal structures of samples. X-ray photoelectron spectroscopy (XPS) measurements were performed with a RBD 147 upgraded Perkin Elmer PHI 5000C ESCA system using Mg Ka radiation and all binding energies were referenced to the contaminant carbon C 1s peak (284.6 eV) for calibration. The specific surface area ( $S_{\text{BET}}$ ) was estimated at liquid nitrogen temperature (77 K) on Micromeritics Tristar 3020 by nitrogen adsorption and desorption. The UV-vis diffuse reflectance spectra (DRS) were carried on a SHIMADZU UV-2450 spectrophotometer with a wavelength range of 320-820 nm and BaSO<sub>4</sub> was used as a reflectance standard. Infrared spectra are implemented by a Fourier transform infrared spectrometer (FT-IR, Nicolet iS 10). The transfer and separation of electron-hole pairs were confirmed by photoluminescence (PL) spectra on a JASCO FP-6500 fluorescence spectrophotometer at the emission wavelength of 385 nm.

### **3. Calculation of AQE**

The apparent quantum efficiency (AQE) of photocatalytic hydrogen evolution was measured using typical experimental setup by applying different monochromatic light filter (320, 350, 400, 420, 450 nm). 0.02 g of the as-prepared photocatalysts were dispersed under constant stirring in a 100 mL mixed solution of 10 vol% triethanolamine. The solution was irradiated with 300 W Xe for 4 h. The average intensity of irradiation is determined by a CEL-NP2000 optical power metre. Hence, AQE could be estimated according to the following equation.

$$\begin{aligned}
\text{QE}\% &= \frac{\text{number of reacted electrons}}{\text{number of incident photons}} \times 100\% \\
&= \frac{\text{number of evolved H}_2 \text{ molecules} \times 2}{\text{number of incident photons}} \times 100\% \\
&= \frac{2 \times n_{\text{H}_2} \times N_A \times h \times c}{S \times P \times t \times \lambda} \times 100\%
\end{aligned}$$

Where  $n_{\text{H}_2}$  was the amount of  $\text{H}_2$  molecules,  $N_A$  was Avogadro constant,  $h$  was the Planck constant,  $c$  was the speed of light,  $S$  was the irradiation area,  $P$  was the intensity of irradiation light,  $t$  was the photoreaction time, and  $\lambda$  represented the wavelength of monochromatic light.

#### 4. Photoelectrochemical measurements

The photocurrent response measurements, electrochemical impedance spectroscopy (EIS) and Mott-Schottky plots were performed on an electrochemical workstation (Chenhua CHI760E, China) in a conventional three electrode with a platinum plate as the counter electrode, a saturated calomel electrode (SCE) as the reference electrode and the prepared photoelectrode as the working electrode. The working electrodes were prepared by drop-coating homogeneous catalyst suspensions directly onto the F-doped  $\text{SnO}_2$ -coated glass (FTO glass) surfaces at  $100\text{ }^\circ\text{C}$  ( $1 \times 1\text{ cm}^2$ ) for 4 h. The transient photocurrent response of the different samples was determined in a  $0.5\text{M Na}_2\text{SO}_4$  aqueous solution under irradiation of a  $300\text{W Xe}$  lamp. Electrochemical impedance spectroscopy (EIS) was accomplished at an open circuit potential, with the frequency ranging from  $100\text{ kHz}$  to  $0.01\text{ Hz}$ , where were in a mixed solution of potassium ferricyanide ( $0.025\text{ M}$ ) and muriate of potash ( $0.1\text{ M}$ ). The Mott-Schottky

measurement was conducted in the potential range from -1.0 to 0.5 V (vs RHE) with a frequency of 0.1, 0.2, 0.3 and 0.5 kHz.

## 5. Theoretical calculation

All spin-polarization density functional theory (DFT) calculations were performed by employing the Vienna ab initio package (VASP)<sup>1,2</sup> within the generalized gradient approximation (GGA) using the Perdew-Burke-Ernzerhof (PBE)<sup>3,4</sup> formulation. The electron-ion interaction was described and taken into account by the projected augmented wave (PAW) potentials<sup>4,5</sup> and a kinetic energy cutoff of a plane wave basis was set with 400 eV. Partial occupancies of the Kohn-Sham orbitals were allowed using the Gaussian smearing method and a width of 0.05 eV. The electronic energy was considered self-consistent when the energy change was smaller than  $10^{-6}$  eV. A geometry optimization was considered convergent when the energy change was smaller than 0.05 eV  $\text{\AA}^{-1}$ . Finally, adsorption binding energies ( $E_b$ ) were calculated as:

$$E_b = E_{\text{ad/sub}} - E_{\text{ad}} - E_{\text{sub}},$$

where  $E_{\text{ad/sub}}$ ,  $E_{\text{ad}}$ , and  $E_{\text{sub}}$  were the total energies of the optimized adsorbate/substrate system, the adsorbate in the gas phase, and the clean substrate, respectively.

The free energy  $\Delta G$  of the reaction was calculated as the difference between the free energies of the initial and final states using the equation:

$$\Delta G = \Delta E + \Delta ZPE - T\Delta S$$

Where  $G$ ,  $E$ ,  $ZPE$  and  $TS$  were the free energy, total energy from DFT calculations, zero point energy and entropic contributions, respectively.

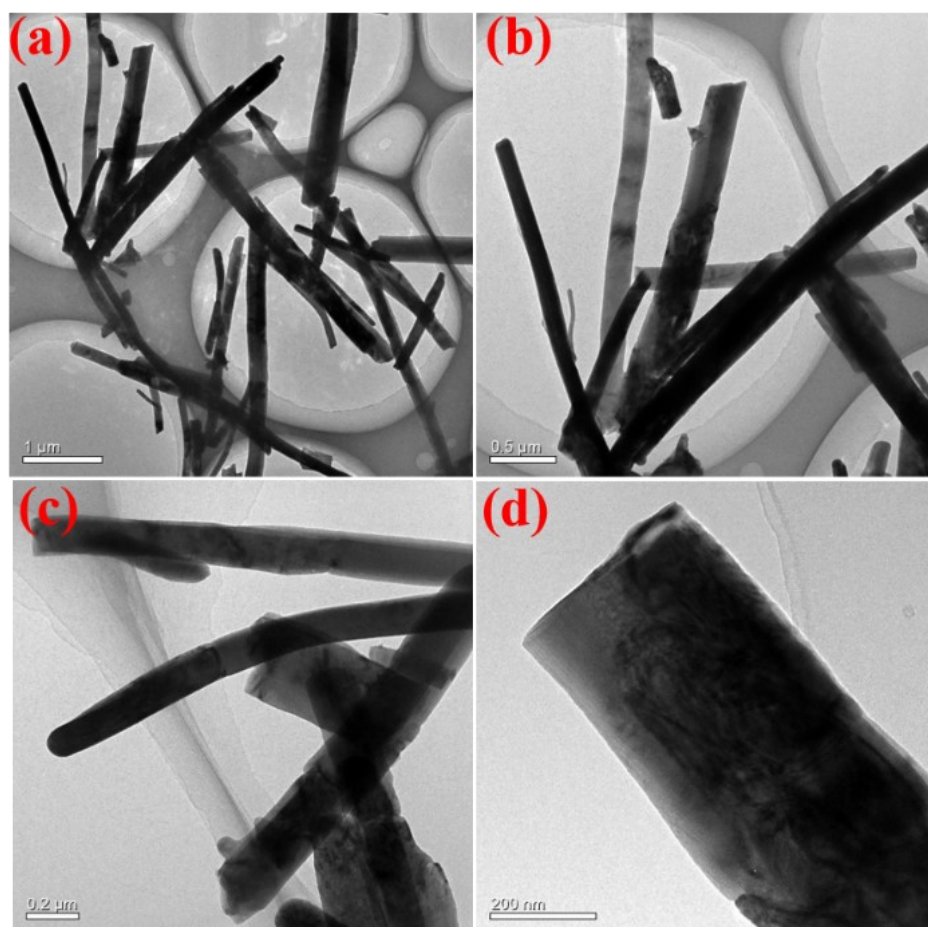

**Fig. S1.** TEM (a-b) and enlarged TEM images (c-d) of NaNbO<sub>3</sub> nanorods.

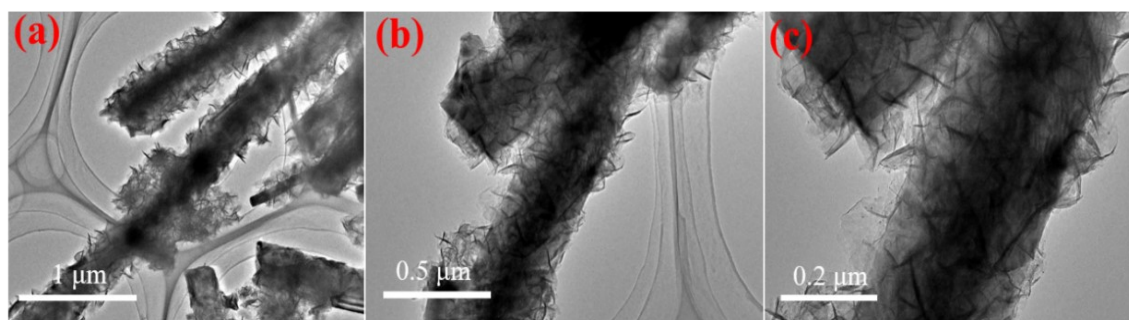

**Fig. S2.** TEM images of NaNbO<sub>3</sub>/ZnIn<sub>2</sub>S<sub>4</sub> composites.

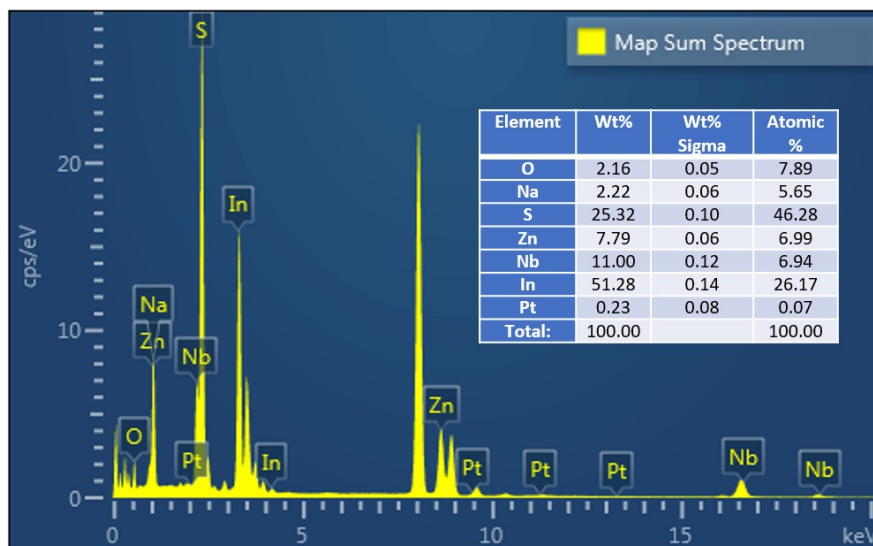

**Fig. S3.** EDX spectrum of  $\text{NaNbO}_3/\text{ZnIn}_2\text{S}_4$  composites and inserted atomic percentages of the elements.

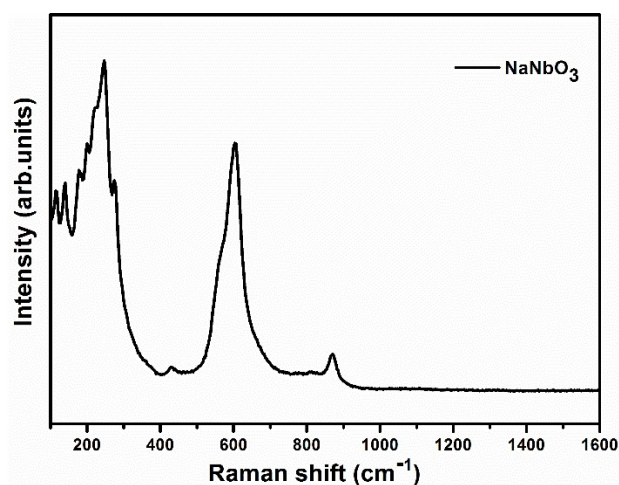

**Fig. S4.** Raman spectroscopy of  $\text{NaNbO}_3$ .

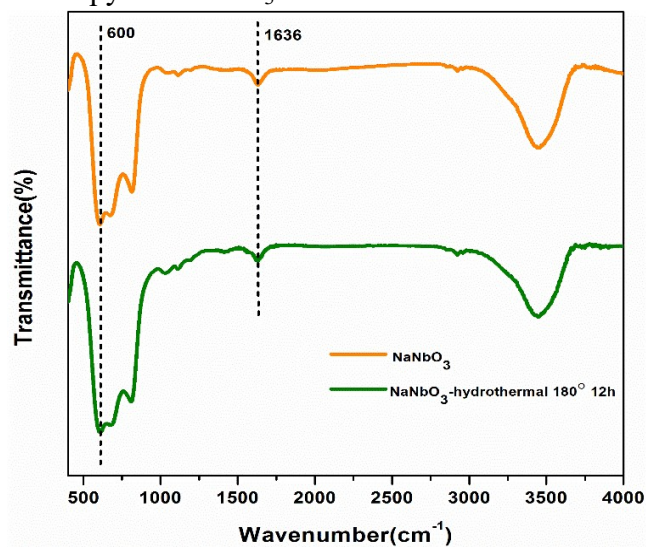

**Fig. S5.** FT-IR spectra of  $\text{NaNbO}_3$  and  $\text{NaNbO}_3$  treated with hydrothermal  $180^\circ$  12h.

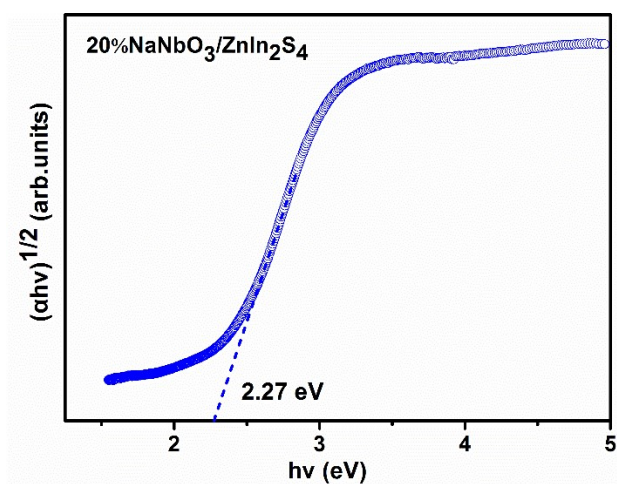

Fig. S6. Tauc plots of 20%NaNbO<sub>3</sub>/ZnIn<sub>2</sub>S<sub>4</sub>.

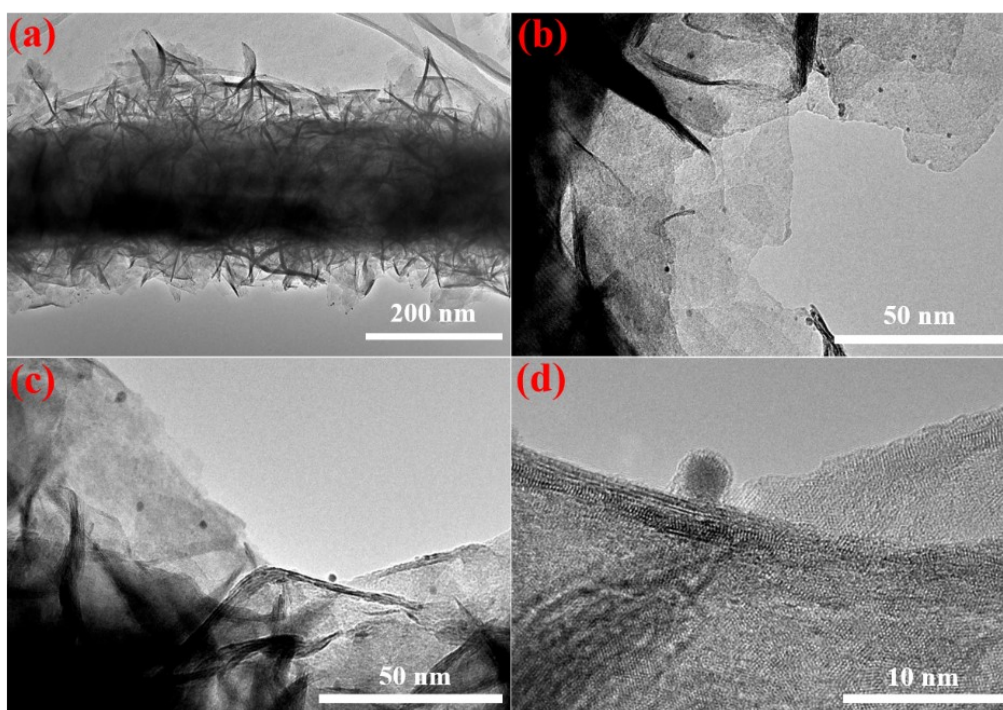

Fig. S7. TEM images (a-d) of synthesized catalysts after five cycle experiments.

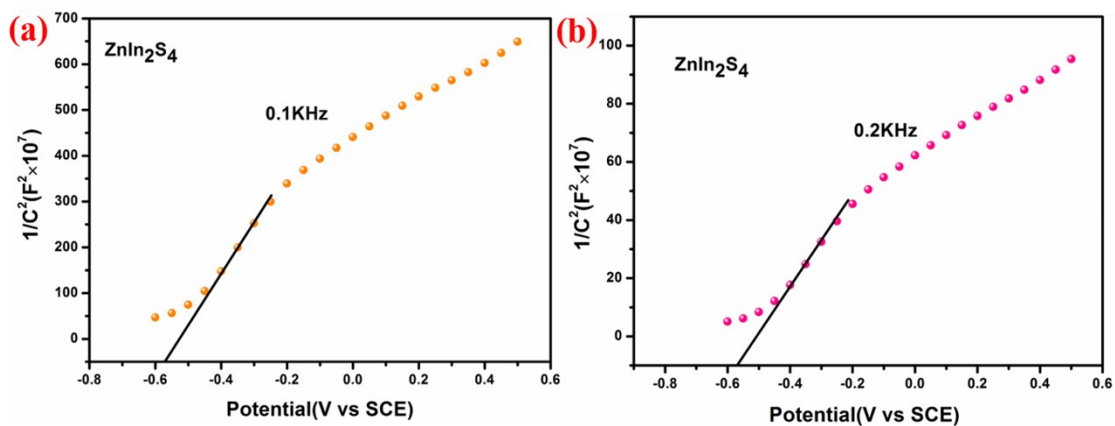

Fig. S8. Mott-Schottky plots of ZnIn<sub>2</sub>S<sub>4</sub> under the frequency of (a) 0.1 and (b) 0.2 kHz,

respectively.

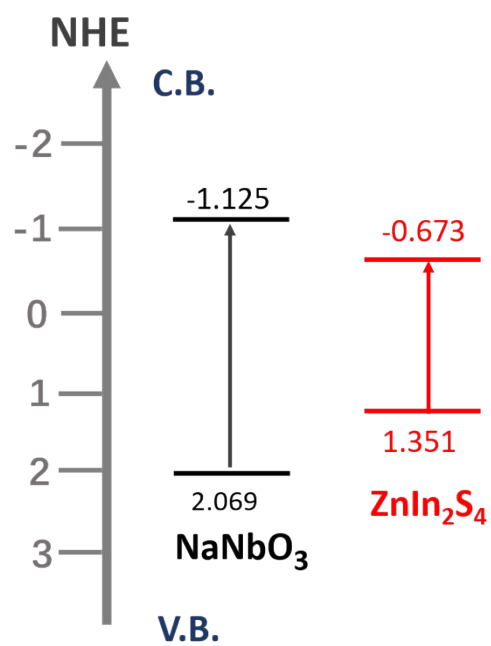

**Fig. S9.** The valence band maximum (VBM) and conduction band minimum (CBM) of NaNbO<sub>3</sub> and ZnIn<sub>2</sub>S<sub>4</sub> calculated based on density functional theory.



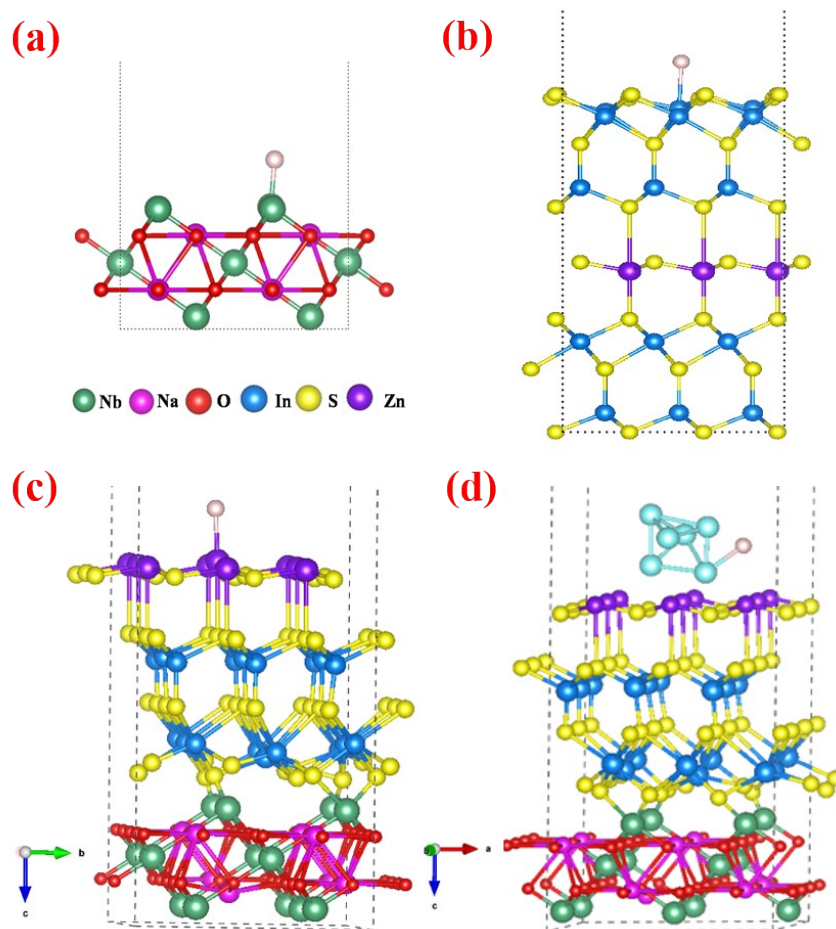

**Fig. S10.** atomic structures of hydrogen adsorption sites on (a)  $\text{NaNbO}_3$ , (b)  $\text{ZnIn}_2\text{S}_4$ , (c)  $\text{NaNbO}_3/\text{ZnIn}_2\text{S}_4$  and (d)  $\text{Pt-NaNbO}_3/\text{ZnIn}_2\text{S}_4$ .

**Table S1.** The surface area and pore size of different samples.

| Photocatalysts                                 | $\text{NaNbO}_3$ | $\text{ZnIn}_2\text{S}_4$ | 10% $\text{NaNbO}_3/$<br>$\text{ZnIn}_2\text{S}_4$ | 15% $\text{NaNbO}_3/$<br>$\text{ZnIn}_2\text{S}_4$ | 20% $\text{NaNbO}_3/$<br>$\text{ZnIn}_2\text{S}_4$ | 25% $\text{NaNbO}_3/$<br>$\text{ZnIn}_2\text{S}_4$ | 30% $\text{NaNbO}_3/$<br>$\text{ZnIn}_2\text{S}_4$ |
|------------------------------------------------|------------------|---------------------------|----------------------------------------------------|----------------------------------------------------|----------------------------------------------------|----------------------------------------------------|----------------------------------------------------|
| $S_{\text{BET}}$ ( $\text{m}^2\text{g}^{-1}$ ) | 7.9              | 46.3                      | 71.8                                               | 74.3                                               | 87.7                                               | 73.4                                               | 69.5                                               |
| Pore size                                      | 8.50             | 10.79                     | 11.61                                              | 12.12                                              | 12.37                                              | 12.21                                              | 13.21                                              |

**Table S2.** Comparison of photocatalytic hydrogen evolution performance with the reported  $\text{NaNbO}_3$ -based photocatalysts.

| Samples                                     | Light source | Incident light (nm) | Sacrificial agents and cocatalysts                           | $\text{H}_2$ ( $\mu\text{mol h}^{-1}$ ) | Ref.      |
|---------------------------------------------|--------------|---------------------|--------------------------------------------------------------|-----------------------------------------|-----------|
| $\text{NaNbO}_3/\text{ZnIn}_2\text{S}_4$    | 300 W Xe     | >300                | TEOA<br>1wt% Pt                                              | 600.8                                   | This work |
| $\text{Au}/\text{CdS}/\text{NaNbO}_3$       | Hi-Tech      | AM 1.5G filter      | 0.1M $\text{Na}_2\text{S}$<br>0.14M $\text{Na}_2\text{SO}_3$ | 54.1                                    | [S6]      |
| $\text{In}_2\text{O}_3/\text{NaNbO}_3$ Rods | 300W Xe      | >300                | 0.8%Pt<br>Methanol                                           | 13                                      | [S7]      |

|                                                                |                  |         |                    |       |       |
|----------------------------------------------------------------|------------------|---------|--------------------|-------|-------|
| <b>Pt/NaNbO<sub>3</sub></b>                                    | 300W Xe          | >300    | Methanol           | 26.6  | [S8]  |
| <b>(LaCo)<sub>0.03</sub>(NaNb)<sub>0.97</sub>O<sub>3</sub></b> | 300W Xe          | >420    | 0.5%Pt<br>Methanol | 11.9  | [S9]  |
| <b>Cubic<br/>NaNbO<sub>3</sub>nanowires</b>                    | 300W Xe          | >300    | 0.5%Pt<br>Methanol | 70    | [S10] |
| <b>Pt/N-rGO/N-NaNbO<sub>3</sub></b>                            | 300W Xe          | >300    | Methanol           | 46.8  | [S11] |
| <b>Pt/NaNbO<sub>3</sub>(O<sub>2</sub>)</b>                     | 300W Xe          | >300    | 0.5%Pt<br>Methanol | 43    | [S12] |
| <b>Ag/NaNbO<sub>3</sub></b>                                    | 150 W<br>Mercury | 200-600 | Formic acid        | 100   | [S13] |
| <b>NaNbO<sub>3</sub>/CdS/NiS<sub>2</sub></b>                   | 300W Xe          | >400    | Lactic acid        | 117.5 | [S14] |
| <b>MoS<sub>x</sub>-CdS-NaNbO<sub>3</sub></b>                   | 300W Xe          | >400    | Lactic acid        | 59.65 | [S15] |
| <b>CdS/Pt/N-NaNbO<sub>3</sub></b>                              | 300W Xe          | >420    | Lactic acid        | 284.4 | [S16] |

**Table S3** Comparison of photocatalytic hydrogen evolution performance with ZnIn<sub>2</sub>S<sub>4</sub>-Based reported works.

| Samples                                                                    | Light source         | Incident light (nm) | Sacrificial agents and cocatalysts                                              | H <sub>2</sub> (μmol h <sup>-1</sup> g <sup>-1</sup> ) | Ref.             |
|----------------------------------------------------------------------------|----------------------|---------------------|---------------------------------------------------------------------------------|--------------------------------------------------------|------------------|
| <b>NaNbO<sub>3</sub>/ZnIn<sub>2</sub>S<sub>4</sub></b>                     | <b>300 W Xe lamp</b> | <b>&gt;300</b>      | <b>TEOA<br/>1wt% Pt</b>                                                         | <b>30038.3</b>                                         | <b>This work</b> |
| in-situ hydrogenated ZnIn <sub>2</sub> S <sub>4</sub>                      | 300 W Xe lamp        | >300                | 0.25 M Na <sub>2</sub> SO <sub>3</sub><br>0.35 M Na <sub>2</sub> S              | 2150                                                   | [S17]            |
| Ag <sub>2</sub> O/ZnIn <sub>2</sub> S <sub>4</sub>                         | 300 W Xe lamp        | >300                | TEOA                                                                            | 466.8                                                  | [S18]            |
| ZnIn <sub>2</sub> S <sub>4</sub> /NH <sub>2</sub> -UiO-66/MoS <sub>2</sub> | 300 W Xe lamp        | >300                | TEOA                                                                            | 5690                                                   | [S19]            |
| ZnIn <sub>2</sub> S <sub>4</sub> @SiO <sub>2</sub> @TiO <sub>2</sub>       | 300 W Xe lamp        | >300                | TEOA                                                                            | 618.3                                                  | [S20]            |
| ZnIn <sub>2</sub> S <sub>4</sub> -MOFL                                     | 300 W Xe lamp        | >300                | 0.25 M Na <sub>2</sub> SO <sub>3</sub><br>0.35 M Na <sub>2</sub> S,<br>2 wt% Pt | 28200                                                  | [S21]            |

|                                                                        |               |       |                                                                                   |         |       |
|------------------------------------------------------------------------|---------------|-------|-----------------------------------------------------------------------------------|---------|-------|
| AgFeO <sub>2</sub> /ZnIn <sub>2</sub> S <sub>4</sub>                   | 300 W Xe lamp | >400  | 0.25 M Na <sub>2</sub> SO <sub>3</sub><br>0.35 M Na <sub>2</sub> S                | 9140    | [S22] |
| ZnIn <sub>2</sub> S <sub>4</sub> /pCN                                  | 300 W Xe lamp | >400  | TEOA                                                                              | 8601    | [S23] |
| N-doped ZnIn <sub>2</sub> S <sub>4</sub>                               | 300 W Xe lamp | >400  | TEOA                                                                              | 11086   | [S24] |
| Mo <sub>2</sub> C/ZnIn <sub>2</sub> S <sub>4</sub>                     | 300 W Xe lamp | ≥ 400 | TEOA                                                                              | 22110   | [S25] |
| ZnIn <sub>2</sub> S <sub>4</sub> /MoSe <sub>2</sub>                    | 300 W Xe lamp | >420  | 0.25 M Na <sub>2</sub> SO <sub>3</sub><br>0.35 M Na <sub>2</sub> S                | 2228    | [S26] |
| CuInS <sub>2</sub> /ZnIn <sub>2</sub> S <sub>4</sub>                   | 300 W Xe lamp | >420  | 0.25 M Na <sub>2</sub> SO <sub>3</sub><br>0.35 M Na <sub>2</sub> S,<br>2 wt% Pt   | 3430.2  | [S27] |
| WO <sub>3</sub> @ZnIn <sub>2</sub> S <sub>4</sub>                      | 300 W Xe lamp | >420  | TEOA                                                                              | 3900    | [S28] |
| ZnIn <sub>2</sub> S <sub>4</sub> /MoS <sub>2</sub> -RGO                | 300 W Xe lamp | >420  | Lactic acid                                                                       | 425.1   | [S29] |
| ZnIn <sub>2</sub> S <sub>4</sub> /Ni <sub>12</sub> P <sub>5</sub>      | 300 W Xe lamp | >420  | 0.35 M Na <sub>2</sub> S<br>0.25 M Na <sub>2</sub> SO <sub>3</sub>                | 2263    | [S30] |
| MoS <sub>2</sub> /Cu-ZnIn <sub>2</sub> S <sub>4</sub>                  | 300 W Xe lamp | >420  | 0.1M ascorbic acid                                                                | 5463    | [S31] |
| ZnIn <sub>2</sub> S <sub>4</sub> /MoS <sub>2</sub> /CdS                | 300 W Xe lamp | >420  | TEOA                                                                              | 7570.4  | [S32] |
| NH <sub>2</sub> -UiO-66/ZnIn <sub>2</sub> S <sub>4</sub>               | 300 W Xe lamp | >420  | 0.35 M Na <sub>2</sub> S<br>0.25 M Na <sub>2</sub> SO <sub>3</sub>                | 2199    | [S33] |
| ZnIn <sub>2</sub> S <sub>4</sub> @Co-doped NH <sub>2</sub> -MIL-53(Fe) | 300 W Xe lamp | ≥ 420 | 0.25 M Na <sub>2</sub> SO <sub>3</sub><br>0.35 M Na <sub>2</sub> S,<br>0.5 wt% Pt | 26954.1 | [S34] |

## Reference

1. G. Kresse and J. Furthmüller, *Comput. Mater. Sci.*, 1996, **6**, 15-50.
2. G. Kresse and J. Furthmüller, *Phys. Rev. B*, 1996, **54**, 11169-11186.
3. John P. Perdew, Kieron Burke and M. Ernzerhof, *Phy. Rev. Let.*, 1996, **78**, 3865-3868.
4. G. Kresse and D. Joubert, *Phy. Rev. B*, 1999, **59**, 1758-1775.
5. P.E. Blochl, *Phys. Rev. B*, 1994, **50**, 17953-17979.

6. K. Nanda, H. Jain, S. Swain and S. Chaudhary, *SMC Bulletin*, 2018, **9**.
7. J. Lv, T. Kako, Z. Li, Z. Zou and J. Ye, *J. Phys. Chem. C*, 2010, **14**, 6157-6162.
8. Q. Liu, Y. Chai, L. Zhang, J. Ren and W. Dai, *Appl. Catal., B*, 2017, **205**, 505-513.
9. P. Li, H. Abe and J. Ye, *Int. J. Photo of Photoenergy*, 2014, 38042.
10. Q. Gu, K. Zhu, N. Zhang, Q. Sun, P. Liu, J. Liu, W. Jing and Z. Li, *J. Phys. Chem. C*, 2015, **119**, 25956-25964.
11. F. Yang, Q. Zhang, L. Zhang, M. Cao, Q. Liu and W. Dai, *Appl. Catal., B*, 2019, **257**, 117901.
12. N. Chen, G. Li and W. Zhang, *Physica B*, 2014, **447**, 12-14.
13. Z. Beata, E. Borowiak-Palen and R. Kalenczuk, *J. Phys. Chem. Solids*, 2011, **72**, 117-123.
14. J. Xu, J. Zhu, J. Niu, M. Chen and J. Yue, *Front Chem*, 2019, **7**, 880.
15. J. Zhu, J. Xu, X. Du, Q. Li, Y. Fu and M. Chen, *Dalton Trans.* 2020, **49**, 8891-8900.
16. F. Yang, Q. Zhang, J. Zhang, L. Zhang, M. Cao and W.-L. Dai, *Appl. Catal., B*, 2020, **278**, 119290.
17. Y. Zhu, L. Wang, Y. Liu, L. Shao and X. Xia, *Appl. Catal., B*, 2018, **241**, 483-490.
18. Y. Xiao, Z. Y. Peng, W. Zhang, Y. Jiang and L. Ni, *Appl. Surf. Sci.*, 2019, **494**, 519-531.
19. Q. Ran, Z. Yu, R. Jiang, L. Qian, Y. Hou, F. Yang, F. Li, M. Li, Q. Sun and H. Zhang, *Catal. Sci. Technol.*, 2020, **10**, 2531-2539.
20. L. Wang, H. Zhou, H. Zhang, Y. Song, H. Zhang and X. Qian, *Inorg. Chem*, 2020, **59**, 2278-2287.
21. Q. Zhang, H. Gu, X. Wang, L. Li, J. Zhang, H. Zhang, Y. Li and W.-L. Dai, *Appl. Catal., B*, 2021, **298**, 120632.
22. D. Kong, H. Fan, D. Yin, D. Zhang, X. Pu, S. Yao and C. Su, *ACS Sustain. Chem. Eng*, 2021, **9**, 2673-2683.
23. H. Yang, R. Cao, P. Sun, J. Yin, S. Zhang and X. Xu, *Appl. Catal. B*, 2019, **256**, 117862.
24. C. Du, B. Yan, Z. Lin and G. Yang, *J. Mater. Chem. A*, 2020, **8**, 207-217.
25. C. Du, B. Yan and G. Yang, *Nano Energy*, 2020, **76**, 105031.
26. D. Zeng, L. Xiao, W.-J. Ong, P. Wu, H. Zheng, Y. Chen and D.-L. Peng, *ChemSusChem*, 2017, **10**, 4624-4631.
27. Z. Guan, J. Pan, Q. Li, G. Li and J. Yang, *ACS Sustainable Chem. Eng*, 2019, **7**, 7736-7742.
28. L. Ye and Z. Wen, *Int. J. Hydrogen Energy*, 2019, **44**, 3751-3759.
29. Z. Guan, P. Wang, Q. Li, G. Li and J. Yang, *Dalton Trans*, 2018, **47**, 6800-6807.
30. D. Zeng, Z. Lu, X. Gao, B. Wu and W. Ong, *Catal. Sci. Technol*, 2019, **9**, 4010-4016.
31. Y.-J. Yuan, D. Chen, J. Zhong, L.-X. Yang, J. Wang, M.-G. Liu, Z.-T. Yu and Z.-G. Zou, *J. Mater. Chem. A*, 2017, **5**, 15771-15779.
32. L. Wang, H. Zhou, H. Zhang, Y. Song, H. Zhang, L. Luo, Y. Yang, S. Bai, Y. Wang and S. Liu, *Nanoscale*, 2020, **12**, 13791-13800.

33. J. Jiang, Q. Zhu, Y. Guo, L. Cheng, Y. Lou and J. Chen, *B. Chem. Soc. Jpn*, 2019, **92**, 1047-1052.
34. F. Dai, Y. Wang, X. Zhou, R. Zhao, J. Han and L. Wang, *Appl. Surf. Sci*, 2020, **517**, 146161.
